# Supplementary material for: Synergistic Antimicrobial Activity of Silver Nanoparticles with an Emergent Class of Azoimidazoles
Source: MDPI journal article supplement (doi:10.3390/pharmaceutics15030926), 2023-03-13
Supplement: s1 [file s1]

Supporting Information

# Synergistic Antimicrobial Activity of Silver Nanoparticles with an Emergent Class of Azoimidazoles

Ana Isabel Ribeiro <sup>1</sup>, Bárbara Vieira <sup>1</sup>, Daniela Dantas <sup>2</sup>, Bárbara Silva <sup>3,4,5</sup>, Eugénia Pinto <sup>3,6,\*</sup>, Fátima Cerqueira <sup>7,8,9</sup>, Renata Silva <sup>4,5</sup>, Fernando Remião <sup>4,5</sup>, Jorge Padrão <sup>1</sup>, Alice Maria Dias <sup>2</sup> and Andrea Zille <sup>1,\*</sup>

<sup>1</sup> Centre for Textile Science and Technology (2C2T), Department of Textile Engineering, University of Minho, Campus of Azurém, 4800-058 Guimarães, Portugal

<sup>2</sup> Department of Chemistry, Chemistry Centre of University of Minho (CQUM), University of Minho, Campus of Gualtar, 4710-057 Braga, Portugal

<sup>3</sup> Laboratory of Microbiology, Biological Sciences Department, Faculty of Pharmacy, University of Porto, 4050-313 Porto, Portugal

<sup>4</sup> UCIBIO—Applied Molecular Biosciences Unit, REQUIMTE, Laboratory of Toxicology, Department of Biological Sciences, Faculty of Pharmacy, University of Porto, Rua de Jorge Viterbo Ferreira n° 228, 4050-313 Porto, Portugal

<sup>5</sup> Associate Laboratory i4HB—Institute for Health and Bioeconomy, Faculty of Pharmacy, University of Porto, 4050-313 Porto, Portugal

<sup>6</sup> CIIMAR/CIMAR, Interdisciplinary Centre of Marine and Environmental Research, Terminal de Cruzeiros do Porto de Leixões, 4450-208 Matosinhos, Portugal

<sup>7</sup> Molecular Oncology and Viral Pathology Group, Research Center of IPO Porto (CI-IPOP)/RISE@CI-IPOP (Health Research Network), Portuguese Oncology Institute of Porto (IPO Porto)/Porto Comprehensive Cancer Center (Porto.CCC), 4200-072 Porto, Portugal

<sup>8</sup> Faculty of Health Sciences, Fernando Pessoa University, 4200-150 Porto, Portugal

<sup>9</sup> Instituto de Investigação, Inovação e Desenvolvimento (FP-I3ID), Biomedical and Health Sciences Research Unit (FP-BHS), Universidade Fernando Pessoa, Praça 9 de Abril, 349, 4249-004 Porto, Portugal

\* Correspondence: epinto@ff.up.pt (E.P.); azille@2c2t.uminho.pt (A.Z.)

**SI-Table S1.** Checkerboard results by combining Amz and AgNPs. Synergism – green; Additive – yellow; Indifferent or antagonist – white.

|                        |      | <i>S. aureus</i> |      |            |      | <i>E. coli</i> |      |            |      | <i>C. albicans</i> |      |            |      | <i>C. krusei</i> |      |            |      |
|------------------------|------|------------------|------|------------|------|----------------|------|------------|------|--------------------|------|------------|------|------------------|------|------------|------|
| [μg·mL <sup>-1</sup> ] |      | AgNPs.Cit        |      | AgNPs.PVP  |      | AgNPs.Cit      |      | AgNPs.PVP  |      | AgNPs.Cit          |      | AgNPs.PVP  |      | AgNPs.Cit        |      | AgNPs.PVP  |      |
| Amz                    | NPs  | Growth (%)       | FICI | Growth (%) | FICI | Growth (%)     | FICI | Growth (%) | FICI | Growth (%)         | FICI | Growth (%) | FICI | Growth (%)       | FICI | Growth (%) | FICI |
| 128.0                  | 1.6  | 1.2              | 1.0  | 3.2        | 1.0  | 1.9            | 1.0  | 4.2        | 1.0  | 0                  | 16.1 | 2.7        | 16.1 | 8.9              | 8.2  | 7.0        | 8.1  |
| 128.0                  | 3.1  | 0                | 1.0  | 0          | 1.0  | 0              | 1.0  | 0          | 1.0  | 4.3                | 16.3 | 7.7        | 16.3 | 16.6             | 8.5  | 9.8        | 8.1  |
| 128.0                  | 6.3  | 0.4              | 1.1  | 8.2        | 1.0  | 3.9            | 1.1  | 6.7        | 1.0  | 3.4                | 16.5 | 0          | 16.5 | 12.3             | 9.0  | 9.0        | 8.3  |
| 128.0                  | 12.5 | 0.7              | 1.1  | 0          | 1.0  | 9.0            | 1.1  | 0          | 1.0  | 8.7                | 17.0 | 0          | 17.0 | 12.6             | 10.0 | 7.5        | 8.5  |
| 128.0                  | 25   | 2.1              | 1.3  | 8.6        | 1.0  | 4.6            | 1.3  | 6.0        | 1.0  | 16.4               | 18.0 | 4.5        | 18.0 | 35.8             | 12.0 | 19.3       | 9.0  |
| 64.0                   | 1.6  | 4.7              | 0.5  | 4.4        | 0.5  | 11.5           | 0.5  | 8.7        | 0.5  | 0                  | 8.1  | 2.4        | 8.1  | 3.7              | 4.2  | 4.9        | 4.1  |
| 64.0                   | 3.1  | 4.2              | 0.5  | 0          | 0.5  | 1.9            | 0.5  | 2.3        | 0.5  | 0                  | 8.3  | 3.0        | 8.3  | 0                | 4.5  | 8.5        | 4.1  |
| 64.0                   | 6.3  | 5.1              | 0.6  | 11.0       | 0.5  | 1.4            | 0.6  | 1.5        | 0.5  | 0                  | 8.5  | 1.8        | 8.5  | 1.1              | 5.0  | 6.2        | 4.3  |
| 64.0                   | 12.5 | 4.9              | 0.6  | 7.8        | 0.5  | 2.6            | 0.6  | 0.3        | 0.5  | 0                  | 9.0  | 8.0        | 9.0  | 7.2              | 6.0  | 8.8        | 4.5  |
| 64.0                   | 25   | 3.1              | 0.8  | 0          | 0.5  | 0              | 0.8  | 0          | 0.5  | 7.1                | 10.0 | 0          | 10.0 | 5.7              | 8.0  | 7.5        | 5.0  |
| 32.0                   | 1.6  | 15.6             | 0.3  | 38.1       | 0.3  | 0.3            | 0.3  | 50.6       | 0.3  | 0                  | 4.1  | 2.1        | 4.1  | 10.6             | 2.2  | 6.4        | 2.1  |
| 32.0                   | 3.1  | 12.6             | 0.3  | 33.7       | 0.3  | 0.5            | 0.3  | 42.5       | 0.3  | 0                  | 4.3  | 1.8        | 4.3  | 8.3              | 2.5  | 7.7        | 2.1  |
| 32.0                   | 6.3  | 11.2             | 0.3  | 38.7       | 0.3  | 50.5           | 0.3  | 52.9       | 0.3  | 0                  | 4.5  | 4.2        | 4.5  | 9.7              | 3.0  | 7.7        | 2.3  |
| 32.0                   | 12.5 | 11.0             | 0.4  | 24.8       | 0.3  | 1.5            | 0.4  | 53.6       | 0.3  | 0                  | 5.0  | 0          | 5.0  | 12.0             | 4.0  | 6.2        | 2.5  |
| 32.0                   | 25   | 10.7             | 0.5  | 9.8        | 0.3  | 1.7            | 0.5  | 47.5       | 0.3  | 13.0               | 6.0  | 3.3        | 6.0  | 19.5             | 6.0  | 8.8        | 3.0  |
| 16.0                   | 1.6  | 20.0             | 0.1  | 65.5       | 0.1  | 0.6            | 0.1  | 70.3       | 0.1  | 0                  | 2.1  | 1.2        | 2.1  | 8.6              | 1.2  | 9.5        | 1.1  |
| 16.0                   | 3.1  | 17.4             | 0.2  | 54.9       | 0.1  | 3.9            | 0.2  | 1.6        | 0.1  | 1.2                | 2.3  | 3.6        | 2.3  | 10.0             | 1.5  | 9.8        | 1.1  |
| 16.0                   | 6.3  | 14.5             | 0.2  | 57.9       | 0.1  | 69.7           | 0.2  | 69.3       | 0.1  | 3.7                | 2.5  | 3.9        | 2.5  | 9.5              | 2.0  | 10.8       | 1.3  |
| 16.0                   | 12.5 | 13.5             | 0.3  | 42.7       | 0.1  | 68.1           | 0.3  | 63.2       | 0.1  | 6.8                | 3.0  | 3.9        | 3.0  | 12.9             | 3.0  | 8.5        | 1.5  |
| 16.0                   | 25   | 9.9              | 0.4  | 25.1       | 0.1  | 54.8           | 0.4  | 54.9       | 0.1  | 24.5               | 4.0  | 0.3        | 4.0  | 21.8             | 5.0  | 13.1       | 2.0  |
| 8.0                    | 1.6  | 25.9             | 0.1  | 79.8       | 0.1  | 79.2           | 0.1  | 80.9       | 0.1  | 3.1                | 1.1  | 4.2        | 1.1  | 15.2             | 0.7  | 14.4       | 0.6  |
| 8.0                    | 3.1  | 22.7             | 0.1  | 72.5       | 0.1  | 76.3           | 0.1  | 74.3       | 0.1  | 3.7                | 1.3  | 4.2        | 1.3  | 13.8             | 1.0  | 13.9       | 0.6  |
| 8.0                    | 6.3  | 21.1             | 0.1  | 69.1       | 0.1  | 79.0           | 0.1  | 10.4       | 0.1  | 2.2                | 1.5  | 3.6        | 1.5  | 14.0             | 1.5  | 12.6       | 0.8  |
| 8.0                    | 12.5 | 19.6             | 0.2  | 64.9       | 0.1  | 74.1           | 0.2  | 2.7        | 0.1  | 0                  | 2.0  | 5.9        | 2.0  | 16.6             | 2.5  | 12.1       | 1.0  |
| 8.0                    | 25   | 13.1             | 0.3  | 38.3       | 0.1  | 2.6            | 0.3  | 66.8       | 0.1  | 0                  | 3.0  | 1.2        | 3.0  | 21.5             | 4.5  | 17.0       | 1.5  |
| 4.0                    | 1.6  | 28.8             | 0.0  | 86.0       | 0.0  | 90.6           | 0.0  | 88.7       | 0.0  | 5.0                | 0.6  | 8.0        | 0.6  | 38.7             | 0.5  | 23.7       | 0.3  |
| 4.0                    | 3.1  | 24.4             | 0.1  | 85.0       | 0.0  | 3.1            | 0.1  | 86.1       | 0.0  | 5.9                | 0.8  | 7.1        | 0.8  | 38.7             | 0.8  | 28.1       | 0.4  |
| 4.0                    | 6.3  | 23.7             | 0.1  | 81.2       | 0.0  | 83.7           | 0.1  | 83.7       | 0.0  | 6.2                | 1.0  | 6.8        | 1.0  | 39.0             | 1.3  | 25.5       | 0.5  |
| 4.0                    | 12.5 | 21.5             | 0.2  | 69.9       | 0.0  | 77.7           | 0.2  | 1.5        | 0.0  | 0.3                | 1.5  | 5.6        | 1.5  | 38.4             | 2.3  | 27.3       | 0.8  |
| 4.0                    | 25   | 14.9             | 0.3  | 40.1       | 0.0  | 59.9           | 0.3  | 18.8       | 0.0  | 2.2                | 2.5  | 5.9        | 2.5  | 40.4             | 4.3  | 28.6       | 1.3  |
| 2.0                    | 1.6  | 30.6             | 0.0  | 96.4       | 0.0  | 94.6           | 0.0  | 100.6      | 0.0  | 9.3                | 0.4  | 13.1       | 0.4  | 97.1             | 0.4  | 87.6       | 0.2  |
| 2.0                    | 3.1  | 28.1             | 0.0  | 98.0       | 0.0  | 91.2           | 0.0  | 88.7       | 0.0  | 9.3                | 0.5  | 12.2       | 0.5  | 90.8             | 0.6  | 89.4       | 0.3  |
| 2.0                    | 6.3  | 26.6             | 0.1  | 91.0       | 0.0  | 83.6           | 0.1  | 88.6       | 0.0  | 5.6                | 0.8  | 11.9       | 0.8  | 82.8             | 1.1  | 81.2       | 0.4  |
| 2.0                    | 12.5 | 22.2             | 0.1  | 71.9       | 0.0  | 77.3           | 0.1  | 78.1       | 0.0  | 8.0                | 1.3  | 6.2        | 1.3  | 34.7             | 2.1  | 75.3       | 0.6  |
| 2.0                    | 25   | 15.2             | 0.3  | 52.1       | 0.0  | 0              | 0.3  | 73.8       | 0.0  | 1.2                | 2.3  | 7.1        | 2.3  | 15.8             | 4.1  | 57.0       | 1.1  |

**SI-Table S2.** Checkerboard results by combining Azolz and AgNPs. Synergism – green; Additive – yellow; Indiferent or antagonist – white.

|                        |      | <i>S. aureus</i> |      |            |      | <i>E. coli</i> |      |            |      | <i>C. albicans</i> |      |            |      | <i>C. krusei</i> |      |            |      |
|------------------------|------|------------------|------|------------|------|----------------|------|------------|------|--------------------|------|------------|------|------------------|------|------------|------|
| [µg·mL <sup>-1</sup> ] |      | AgNPs.Cit        |      | AgNPs.PVP  |      | AgNPs.Cit      |      | AgNPs.PVP  |      | AgNPs.Cit          |      | AgNPs.PVP  |      | AgNPs.Cit        |      | AgNPs.PVP  |      |
| Azolz                  | NPs  | Growth (%)       | FICI | Growth (%) | FICI | Growth (%)     | FICI | Growth (%) | FICI | Growth (%)         | FICI | Growth (%) | FICI | Growth (%)       | FICI | Growth (%) | FICI |
| 128.0                  | 1.6  | 2.2              | 1.0  | 4.7        | 1.0  | 1.0            | 1.0  | 0.9        | 1.0  | 3.8                | 32.1 | 8.0        | 32.1 | 6.9              | 16.2 | 8.0        | 16.1 |
| 128.0                  | 3.1  | 0                | 1.0  | 3.3        | 1.0  | 2.3            | 1.0  | 5.6        | 1.0  | 16.5               | 32.3 | 9.0        | 32.3 | 15.2             | 16.5 | 16.2       | 16.1 |
| 128.0                  | 6.3  | 12.5             | 1.1  | 2.1        | 1.0  | 8.6            | 1.1  | 0          | 1.0  | 2.4                | 32.5 | 9.4        | 32.5 | 11.2             | 17.0 | 7.4        | 16.3 |
| 128.0                  | 12.5 | 4.8              | 1.1  | 3.8        | 1.0  | 7.4            | 1.1  | 7.8        | 1.0  | 30.7               | 33.0 | 17.5       | 33.0 | 27.1             | 18.0 | 33.0       | 16.5 |
| 128.0                  | 25   | 29.7             | 1.3  | 2.8        | 1.0  | 1.2            | 1.3  | 5.1        | 1.0  | 0                  | 34.0 | 0.9        | 34.0 | 25.3             | 20.0 | 6.6        | 17.0 |
| 64.0                   | 1.6  | 25.7             | 0.5  | 26.4       | 0.5  | 2.4            | 0.5  | 43.4       | 0.5  | 11.8               | 16.1 | 8.0        | 16.1 | 15.4             | 8.2  | 8.5        | 8.1  |
| 64.0                   | 3.1  | 24.4             | 0.5  | 23.8       | 0.5  | 1.2            | 0.5  | 5.6        | 0.5  | 9.9                | 16.3 | 28.8       | 16.3 | 14.6             | 8.5  | 20.1       | 8.1  |
| 64.0                   | 6.3  | 17.0             | 0.6  | 26.6       | 0.5  | 25.5           | 0.6  | 4.9        | 0.5  | 3.8                | 16.5 | 7.5        | 16.5 | 14.6             | 9.0  | 9.1        | 8.3  |
| 64.0                   | 12.5 | 12.9             | 0.6  | 25.7       | 0.5  | 0              | 0.6  | 3.3        | 0.5  | 21.2               | 17.0 | 7.5        | 17.0 | 5.9              | 10.0 | 4.9        | 8.5  |
| 64.0                   | 25   | 0                | 0.8  | 23.8       | 0.5  | 0              | 0.8  | 12.5       | 0.5  | 15.6               | 18.0 | 16.5       | 18.0 | 26.3             | 12.0 | 7.4        | 9.0  |
| 32.0                   | 1.6  | 42.7             | 0.3  | 56.9       | 0.3  | 3.4            | 0.3  | 78.6       | 0.3  | 9.0                | 8.1  | 9.9        | 8.1  | 12.8             | 4.2  | 10.2       | 4.1  |
| 32.0                   | 3.1  | 41.9             | 0.3  | 53.6       | 0.3  | 1.4            | 0.3  | 75.6       | 0.3  | 5.7                | 8.3  | 3.8        | 8.3  | 7.7              | 4.5  | 9.1        | 4.1  |
| 32.0                   | 6.3  | 40.1             | 0.3  | 55.7       | 0.3  | 48.3           | 0.3  | 47.6       | 0.3  | 12.3               | 8.5  | 12.3       | 8.5  | 13.6             | 5.0  | 9.1        | 4.3  |
| 32.0                   | 12.5 | 32.5             | 0.4  | 46.7       | 0.3  | 50.8           | 0.4  | 46.7       | 0.3  | 9.0                | 9.0  | 21.7       | 9.0  | 8.8              | 6.0  | 11.3       | 4.5  |
| 32.0                   | 25   | 34.9             | 0.5  | 44.8       | 0.3  | 30.9           | 0.5  | 25.7       | 0.3  | 36.3               | 10.0 | 6.1        | 10.0 | 40.4             | 8.0  | 10.2       | 5.0  |
| 16.0                   | 1.6  | 64.5             | 0.1  | 74.8       | 0.1  | 59.6           | 0.1  | 84.1       | 0.1  | 9.0                | 4.1  | 8.5        | 4.1  | 13.3             | 2.2  | 10.4       | 2.1  |
| 16.0                   | 3.1  | 62.1             | 0.2  | 73.4       | 0.1  | 46.9           | 0.2  | 85.6       | 0.1  | 3.3                | 4.3  | 6.6        | 4.3  | 11.2             | 2.5  | 10.7       | 2.1  |
| 16.0                   | 6.3  | 59.9             | 0.2  | 75.0       | 0.1  | 3.6            | 0.2  | 59.0       | 0.1  | 3.3                | 4.5  | 5.7        | 4.5  | 8.0              | 3.0  | 13.2       | 2.3  |
| 16.0                   | 12.5 | 59.0             | 0.3  | 66.4       | 0.1  | 63.0           | 0.3  | 51.8       | 0.1  | 0                  | 5.0  | 7.5        | 5.0  | 0                | 4.0  | 9.9        | 2.5  |
| 16.0                   | 25   | 32.7             | 0.4  | 52.4       | 0.1  | 35.8           | 0.4  | 40.1       | 0.1  | 0                  | 6.0  | 3.3        | 6.0  | 2.7              | 6.0  | 13.5       | 3.0  |
| 8.0                    | 1.6  | 72.8             | 0.1  | 87.2       | 0.1  | 88.2           | 0.1  | 100.2      | 0.1  | 7.5                | 2.1  | 5.2        | 2.1  | 14.1             | 1.2  | 15.4       | 1.1  |
| 8.0                    | 3.1  | 70.2             | 0.1  | 86.7       | 0.1  | 71.1           | 0.1  | 94.1       | 0.1  | 8.5                | 2.3  | 7.5        | 2.3  | 12.8             | 1.5  | 13.7       | 1.1  |
| 8.0                    | 6.3  | 69.0             | 0.1  | 85.7       | 0.1  | 64.7           | 0.1  | 88.4       | 0.1  | 9.9                | 2.5  | 7.1        | 2.5  | 17.0             | 2.0  | 14.3       | 1.3  |
| 8.0                    | 12.5 | 59.8             | 0.2  | 75.2       | 0.1  | 41.5           | 0.2  | 72.2       | 0.1  | 14.2               | 3.0  | 6.6        | 3.0  | 17.3             | 3.0  | 12.4       | 1.5  |
| 8.0                    | 25   | 43.0             | 0.3  | 59.8       | 0.1  | 55.3           | 0.3  | 48.3       | 0.1  | 15.1               | 4.0  | 11.3       | 4.0  | 42.6             | 5.0  | 19.2       | 2.0  |
| 4.0                    | 1.6  | 75.9             | 0.0  | 91.7       | 0.0  | 100.6          | 0.0  | 71.3       | 0.0  | 9.0                | 1.1  | 8.5        | 1.1  | 20.2             | 0.7  | 18.4       | 0.6  |
| 4.0                    | 3.1  | 72.5             | 0.1  | 93.4       | 0.0  | 98.8           | 0.1  | 84.5       | 0.0  | 12.7               | 1.3  | 9.0        | 1.3  | 17.6             | 1.0  | 21.7       | 0.6  |
| 4.0                    | 6.3  | 73.1             | 0.1  | 99.5       | 0.0  | 72.4           | 0.1  | 84.9       | 0.0  | 13.2               | 1.5  | 7.1        | 1.5  | 14.4             | 1.5  | 21.2       | 0.8  |
| 4.0                    | 12.5 | 65.8             | 0.2  | 84.5       | 0.0  | 8.5            | 0.2  | 77.4       | 0.0  | 25.0               | 2.0  | 9.4        | 2.0  | 19.7             | 2.5  | 19.5       | 1.0  |
| 4.0                    | 25   | 67.3             | 0.3  | 69.1       | 0.0  | 49.8           | 0.3  | 55.6       | 0.0  | 41.0               | 3.0  | 18.4       | 3.0  | 33.2             | 4.5  | 20.1       | 1.5  |
| 2.0                    | 1.6  | 80.6             | 0.0  | 100.5      | 0.0  | 103.0          | 0.0  | 70.1       | 0.0  | 16.5               | 0.6  | 17.0       | 0.6  | 75.0             | 0.5  | 89.6       | 0.3  |
| 2.0                    | 3.1  | 77.8             | 0.0  | 102.4      | 0.0  | 102.1          | 0.0  | 67.6       | 0.0  | 14.6               | 0.8  | 12.3       | 0.8  | 26.9             | 0.8  | 87.1       | 0.4  |
| 2.0                    | 6.3  | 73.9             | 0.1  | 96.9       | 0.0  | 83.5           | 0.1  | 90.9       | 0.0  | 17.5               | 1.0  | 14.6       | 1.0  | 13.0             | 1.3  | 80.8       | 0.5  |
| 2.0                    | 12.5 | 67.5             | 0.1  | 89.5       | 0.0  | 79.8           | 0.1  | 80.6       | 0.0  | 29.2               | 1.5  | 10.8       | 1.5  | 11.2             | 2.3  | 77.5       | 0.8  |
| 2.0                    | 25   | 62.6             | 0.3  | 70.3       | 0.0  | 9.3            | 0.3  | 48.6       | 0.0  | 21.7               | 2.5  | 12.7       | 2.5  | 11.2             | 4.3  | 19.5       | 1.3  |

**SI-Table S3.** Checkerboard results by combining Azolz.DMA and AgNPs. Synergism – green; Additive – yellow; Indiferent or antagonist – white.

|                        |      | <i>S. aureus</i> |      |               |      | <i>E. coli</i> |      |               |      | <i>C. albicans</i> |      |               |      | <i>C. krusei</i> |      |               |      |
|------------------------|------|------------------|------|---------------|------|----------------|------|---------------|------|--------------------|------|---------------|------|------------------|------|---------------|------|
| [µg·mL <sup>-1</sup> ] |      | AgNPs.Cit        |      | AgNPs.PVP     |      | AgNPs.Cit      |      | AgNPs.PVP     |      | AgNPs.Cit          |      | AgNPs.PVP     |      | AgNPs.Cit        |      | AgNPs.PVP     |      |
| Azolz.<br>DMA          | NPs  | Growth<br>(%)    | FICI | Growth<br>(%) | FICI | Growth<br>(%)  | FICI | Growth<br>(%) | FICI | Growth<br>(%)      | FICI | Growth<br>(%) | FICI | Growth<br>(%)    | FICI | Growth<br>(%) | FICI |
| 128.0                  | 1.6  | 0                | 2.0  | 4.2           | 2.0  | 6.8            | 1.0  | 0             | 1.0  | 0                  | 16.1 | 10.4          | 16.1 | 0.3              | 16.2 | 16.4          | 16.1 |
| 128.0                  | 3.1  | 0                | 2.0  | 15.1          | 2.0  | 0              | 1.0  | 0             | 1.0  | 5.9                | 16.3 | 0             | 16.3 | 14.2             | 16.5 | 0             | 16.1 |
| 128.0                  | 6.3  | 0                | 2.1  | 5.6           | 2.0  | 0              | 1.1  | 0             | 1.0  | 6.7                | 16.5 | 1.0           | 16.5 | 10.2             | 17.0 | 6.8           | 16.3 |
| 128.0                  | 12.5 | 5.4              | 2.1  | 21.0          | 2.0  | 0              | 1.1  | 0             | 1.0  | 9.5                | 17.0 | 16.0          | 17.0 | 0                | 18.0 | 8.6           | 16.5 |
| 128.0                  | 25   | 0                | 2.3  | 8.6           | 2.0  | 0              | 1.3  | 2.0           | 1.0  | 0                  | 18.0 | 18.6          | 18.0 | 16.5             | 20.0 | 28.1          | 17.0 |
| 64.0                   | 1.6  | 0                | 1.0  | 0             | 1.0  | 0              | 0.5  | 19.4          | 0.5  | 0                  | 8.1  | 0             | 8.1  | 7.3              | 8.2  | 0.5           | 8.1  |
| 64.0                   | 3.1  | 0                | 1.0  | 0             | 1.0  | 0              | 0.5  | 15.2          | 0.5  | 0                  | 8.3  | 1.5           | 8.3  | 6.3              | 8.5  | 7.8           | 8.1  |
| 64.0                   | 6.3  | 0                | 1.1  | 0             | 1.0  | 0              | 0.6  | 0             | 0.5  | 0                  | 8.5  | 0             | 8.5  | 1.8              | 9.0  | 2.9           | 8.3  |
| 64.0                   | 12.5 | 0                | 1.1  | 0             | 1.0  | 0              | 0.6  | 0             | 0.5  | 2.5                | 9.0  | 2.9           | 9.0  | 7.1              | 10.0 | 5.5           | 8.5  |
| 64.0                   | 25   | 0                | 1.3  | 0             | 1.0  | 0              | 0.8  | 0             | 0.5  | 16.8               | 10.0 | 1.0           | 10.0 | 39.9             | 12.0 | 10.9          | 9.0  |
| 32.0                   | 1.6  | 27.1             | 0.5  | 8.9           | 0.5  | 64.5           | 0.3  | 70.7          | 0.3  | 0                  | 4.1  | 0             | 4.1  | 7.6              | 4.2  | 6.5           | 4.1  |
| 32.0                   | 3.1  | 14.7             | 0.5  | 13.3          | 0.5  | 64.8           | 0.3  | 71.2          | 0.3  | 0                  | 4.3  | 0.5           | 4.3  | 8.7              | 4.5  | 8.8           | 4.1  |
| 32.0                   | 6.3  | 19.4             | 0.6  | 12.7          | 0.5  | 56.5           | 0.3  | 57.1          | 0.3  | 0                  | 4.5  | 0             | 4.5  | 10.8             | 5.0  | 5.2           | 4.3  |
| 32.0                   | 12.5 | 29.0             | 0.6  | 0             | 0.5  | 60.0           | 0.4  | 44.9          | 0.3  | 0                  | 5.0  | 2.7           | 5.0  | 9.4              | 6.0  | 9.6           | 4.5  |
| 32.0                   | 25   | 0                | 0.8  | 0             | 0.5  | 5.5            | 0.5  | 23.8          | 0.3  | 30.0               | 6.0  | 3.1           | 6.0  | 35.4             | 8.0  | 10.9          | 5.0  |
| 16.0                   | 1.6  | 65.6             | 0.3  | 50.2          | 0.3  | 90.6           | 0.1  | 82.2          | 0.1  | 0.8                | 2.1  | 0.0           | 2.1  | 11.0             | 2.2  | 9.6           | 2.1  |
| 16.0                   | 3.1  | 53.8             | 0.3  | 45.4          | 0.3  | 93.5           | 0.2  | 88.5          | 0.1  | 0                  | 2.3  | 0.5           | 2.3  | 9.4              | 2.5  | 9.4           | 2.1  |
| 16.0                   | 6.3  | 48.3             | 0.3  | 44.5          | 0.3  | 90.6           | 0.2  | 84.0          | 0.1  | 0                  | 2.5  | 1.7           | 2.5  | 7.3              | 3.0  | 10.4          | 2.3  |
| 16.0                   | 12.5 | 60.2             | 0.4  | 38.3          | 0.3  | 91.8           | 0.3  | 78.2          | 0.1  | 0                  | 3.0  | 1.2           | 3.0  | 9.2              | 4.0  | 10.1          | 2.5  |
| 16.0                   | 25   | 12.0             | 0.5  | 19.1          | 0.3  | 42.6           | 0.4  | 47.6          | 0.1  | 28.0               | 4.0  | 5.3           | 4.0  | 37.0             | 6.0  | 13.5          | 3.0  |
| 8.0                    | 1.6  | 96.9             | 0.1  | 67.8          | 0.1  | 98.8           | 0.1  | 90.8          | 0.1  | 2.8                | 1.1  | 4.4           | 1.1  | 16.0             | 1.2  | 13.0          | 1.1  |
| 8.0                    | 3.1  | 79.8             | 0.2  | 66.7          | 0.1  | 97.5           | 0.1  | 92.3          | 0.1  | 1.1                | 1.3  | 4.1           | 1.3  | 12.1             | 1.5  | 13.8          | 1.1  |
| 8.0                    | 6.3  | 72.3             | 0.2  | 63.4          | 0.1  | 94.9           | 0.1  | 85.0          | 0.1  | 1.1                | 1.5  | 3.1           | 1.5  | 8.9              | 2.0  | 12.5          | 1.3  |
| 8.0                    | 12.5 | 72.6             | 0.3  | 52.8          | 0.1  | 98.9           | 0.2  | 76.9          | 0.1  | 0.0                | 2.0  | 3.1           | 2.0  | 8.1              | 3.0  | 11.9          | 1.5  |
| 8.0                    | 25   | 44.3             | 0.4  | 33.9          | 0.1  | 68.9           | 0.3  | 50.9          | 0.1  | 1.7                | 3.0  | 3.6           | 3.0  | 38.8             | 5.0  | 15.1          | 2.0  |
| 4.0                    | 1.6  | 115.5            | 0.1  | 75.6          | 0.1  | 101.1          | 0.0  | 83.7          | 0.0  | 5.6                | 0.6  | 7.7           | 0.6  | 51.7             | 0.7  | 48.1          | 0.6  |
| 4.0                    | 3.1  | 100.0            | 0.1  | 78.8          | 0.1  | 105.7          | 0.1  | 92.7          | 0.0  | 3.9                | 0.8  | 8.0           | 0.8  | 15.5             | 1.0  | 52.5          | 0.6  |
| 4.0                    | 6.3  | 85.3             | 0.1  | 73.5          | 0.1  | 96.4           | 0.1  | 85.7          | 0.0  | 2.5                | 1.0  | 8.0           | 1.0  | 11.8             | 1.5  | 48.3          | 0.8  |
| 4.0                    | 12.5 | 83.4             | 0.2  | 63.2          | 0.1  | 99.0           | 0.2  | 84.2          | 0.0  | 3.1                | 1.5  | 6.3           | 1.5  | 15.7             | 2.5  | 31.9          | 1.0  |
| 4.0                    | 25   | 33.2             | 0.3  | 45.4          | 0.1  | 64.7           | 0.3  | 45.3          | 0.0  | 0                  | 2.5  | 8.5           | 2.5  | 29.1             | 4.5  | 10.6          | 1.5  |
| 2.0                    | 1.6  | 125.5            | 0.0  | 84.6          | 0.0  | 101.5          | 0.0  | 65.9          | 0.0  | 11.8               | 0.4  | 18.4          | 0.4  | 81.9             | 0.5  | 89.9          | 0.3  |
| 2.0                    | 3.1  | 114.1            | 0.1  | 86.7          | 0.0  | 106.3          | 0.0  | 84.5          | 0.0  | 9.2                | 0.5  | 16.2          | 0.5  | 26.2             | 0.8  | 87.3          | 0.4  |
| 2.0                    | 6.3  | 105.4            | 0.1  | 79.9          | 0.0  | 100.7          | 0.1  | 71.5          | 0.0  | 10.1               | 0.8  | 10.9          | 0.8  | 9.7              | 1.3  | 76.4          | 0.5  |
| 2.0                    | 12.5 | 85.3             | 0.2  | 69.3          | 0.0  | 95.7           | 0.1  | 79.0          | 0.0  | 9.2                | 1.3  | 7.7           | 1.3  | 10.5             | 2.3  | 64.2          | 0.8  |
| 2.0                    | 25   | 40.1             | 0.3  | 54.3          | 0.0  | 56.3           | 0.3  | 47.9          | 0.0  | 7.6                | 2.3  | 9.0           | 2.3  | 22.0             | 4.3  | 13.5          | 1.3  |

**SI-Table S4.** Checkerboard results by combining Azolz.Pip and AgNPs. Synergism – green; Additive – yellow; Indifferent or antagonist – white.

|                        |      | <i>S. aureus</i> |     |           |     | <i>E. coli</i> |     |           |     | <i>C. albicans</i> |      |           |      | <i>C. krusei</i> |      |           |      |
|------------------------|------|------------------|-----|-----------|-----|----------------|-----|-----------|-----|--------------------|------|-----------|------|------------------|------|-----------|------|
| [µg·mL <sup>-1</sup> ] |      | AgNPs.Cit        |     | AgNPs.PVP |     | AgNPs.Cit      |     | AgNPs.PVP |     | AgNPs.Cit          |      | AgNPs.PVP |      | AgNPs.Cit        |      | AgNPs.PVP |      |
| Azol.                  | Pip  | Growth (%)       |     | FICI      |     | Growth (%)     |     | FICI      |     | Growth (%)         |      | FICI      |      | Growth (%)       |      | FICI      |      |
| 128.0                  | 1.6  | 8.5              | 2.0 | 0         | 2.0 | 27.5           | 2.0 | 36.0      | 2.0 | 42.9               | 32.1 | 45.2      | 32.1 | 29.8             | 16.2 | 27.2      | 16.1 |
| 128.0                  | 3.1  | 41.6             | 2.0 | 0         | 2.0 | 32.3           | 2.0 | 16.2      | 2.0 | 1.2                | 32.3 | 77.4      | 32.3 | 24.7             | 16.5 | 22.6      | 16.1 |
| 128.0                  | 6.3  | 41.8             | 2.1 | 28.0      | 2.0 | 22.8           | 2.1 | 11.8      | 2.0 | 0                  | 32.5 | 70.3      | 32.5 | 19.9             | 17.0 | 18.2      | 16.3 |
| 128.0                  | 12.5 | 7.5              | 2.1 | 39.4      | 2.0 | 42.1           | 2.1 | 20.4      | 2.0 | 61.3               | 33.0 | 125.2     | 33.0 | 17.7             | 18.0 | 16.2      | 16.5 |
| 128.0                  | 25   | 33.5             | 2.3 | 13.4      | 2.0 | 27.6           | 2.3 | 12.4      | 2.0 | 1.8                | 34.0 | 175.5     | 34.0 | 66.0             | 20.0 | 60.3      | 17.0 |
| 64.0                   | 1.6  | 0                | 1.0 | 0         | 1.0 | 0              | 1.0 | 0         | 1.0 | 25.6               | 16.1 | 5.8       | 16.1 | 0                | 8.2  | 0         | 8.1  |
| 64.0                   | 3.1  | 0                | 1.0 | 0         | 1.0 | 0              | 1.0 | 0         | 1.0 | 8.3                | 16.3 | 0         | 16.3 | 0.3              | 8.5  | 0.3       | 8.1  |
| 64.0                   | 6.3  | 0                | 1.1 | 0         | 1.0 | 0              | 1.1 | 0         | 1.0 | 0                  | 16.5 | 23.2      | 16.5 | -6.2             | 9.0  | 0         | 8.3  |
| 64.0                   | 12.5 | 0                | 1.1 | 0         | 1.0 | 0              | 1.1 | 0         | 1.0 | 38.7               | 17.0 | 38.1      | 17.0 | 12.9             | 10.0 | 11.8      | 8.5  |
| 64.0                   | 25   | 0                | 1.3 | 0         | 1.0 | 0              | 1.3 | 0         | 1.0 | 45.8               | 18.0 | 16.8      | 18.0 | 10.1             | 12.0 | 9.2       | 9.0  |
| 32.0                   | 1.6  | 0.4              | 0.5 | 5.0       | 0.5 | 42.3           | 0.5 | 54.6      | 0.5 | 22.6               | 8.1  | 0         | 8.1  | 0                | 4.2  | 0         | 4.1  |
| 32.0                   | 3.1  | 2.2              | 0.5 | 1.6       | 0.5 | 40.9           | 0.5 | 50.7      | 0.5 | 20.2               | 8.3  | 0         | 8.3  | 0                | 4.5  | 0         | 4.1  |
| 32.0                   | 6.3  | 0                | 0.6 | 0         | 0.5 | 34.0           | 0.6 | 42.5      | 0.5 | 0.6                | 8.5  | 0         | 8.5  | 0                | 5.0  | 0         | 4.3  |
| 32.0                   | 12.5 | 3.2              | 0.6 | 0         | 0.5 | 32.1           | 0.6 | 40.7      | 0.5 | 0                  | 9.0  | 0         | 9.0  | 0                | 6.0  | 0         | 4.5  |
| 32.0                   | 25   | 0                | 0.8 | 0         | 0.5 | 0              | 0.8 | 14.6      | 0.5 | 0                  | 10.0 | 0         | 10.0 | 0.3              | 8.0  | 0.3       | 5.0  |
| 16.0                   | 1.6  | 51.9             | 0.3 | 50.0      | 0.3 | 72.2           | 0.3 | 84.8      | 0.3 | 10.7               | 4.1  | 0         | 4.1  | 0                | 2.2  | 0         | 2.1  |
| 16.0                   | 3.1  | 49.1             | 0.3 | 49.4      | 0.3 | 66.5           | 0.3 | 87.6      | 0.3 | 7.1                | 4.3  | 0         | 4.3  | 0                | 2.5  | 0         | 2.1  |
| 16.0                   | 6.3  | 47.5             | 0.3 | 53.4      | 0.3 | 61.1           | 0.3 | 77.3      | 0.3 | 0                  | 4.5  | 0         | 4.5  | 0                | 3.0  | 0.5       | 2.3  |
| 16.0                   | 12.5 | 49.5             | 0.4 | 41.4      | 0.3 | 61.4           | 0.4 | 68.7      | 0.3 | 0                  | 5.0  | 0         | 5.0  | 0                | 4.0  | 0         | 2.5  |
| 16.0                   | 25   | 10.3             | 0.5 | 18.6      | 0.3 | 20.5           | 0.5 | 39.4      | 0.3 | 0                  | 6.0  | 11.0      | 6.0  | 5.1              | 6.0  | 4.6       | 3.0  |
| 8.0                    | 1.6  | 76.4             | 0.1 | 72.2      | 0.1 | 84.3           | 0.1 | 96.0      | 0.1 | 6.5                | 2.1  | 0         | 2.1  | 5.6              | 1.2  | 5.1       | 1.1  |
| 8.0                    | 3.1  | 71.7             | 0.2 | 76.0      | 0.1 | 79.1           | 0.2 | 92.7      | 0.1 | 11.3               | 2.3  | 0         | 2.3  | 4.5              | 1.5  | 4.1       | 1.1  |
| 8.0                    | 6.3  | 79.6             | 0.2 | 72.4      | 0.1 | 75.7           | 0.2 | 89.1      | 0.1 | 11.9               | 2.5  | 0         | 2.5  | 5.1              | 2.0  | 4.6       | 1.3  |
| 8.0                    | 12.5 | 75.4             | 0.3 | 75.0      | 0.1 | 77.4           | 0.3 | 79.5      | 0.1 | 8.9                | 3.0  | 0         | 3.0  | 2.8              | 3.0  | 2.6       | 1.5  |
| 8.0                    | 25   | 57.0             | 0.4 | 41.6      | 0.1 | 44.4           | 0.4 | 58.3      | 0.1 | 36.9               | 4.0  | 0         | 4.0  | 7.0              | 5.0  | 6.4       | 2.0  |
| 4.0                    | 1.6  | 87.1             | 0.1 | 85.8      | 0.1 | 93.0           | 0.1 | 102.2     | 0.1 | 7.1                | 1.1  | 4.5       | 1.1  | 16.0             | 0.7  | 14.6      | 0.6  |
| 4.0                    | 3.1  | 79.8             | 0.1 | 79.6      | 0.1 | 83.5           | 0.1 | 102.8     | 0.1 | 8.3                | 1.3  | 8.4       | 1.3  | 11.2             | 1.0  | 10.3      | 0.6  |
| 4.0                    | 6.3  | 84.6             | 0.1 | 81.6      | 0.1 | 79.7           | 0.1 | 99.9      | 0.1 | 8.3                | 1.5  | 0         | 1.5  | 11.0             | 1.5  | 10.0      | 0.8  |
| 4.0                    | 12.5 | 79.4             | 0.2 | 77.0      | 0.1 | 75.3           | 0.2 | 88.7      | 0.1 | 3.6                | 2.0  | 1.3       | 2.0  | 10.7             | 2.5  | 9.7       | 1.0  |
| 4.0                    | 25   | 66.1             | 0.3 | 57.0      | 0.1 | 45.7           | 0.3 | 60.5      | 0.1 | 25.6               | 3.0  | 0         | 3.0  | 13.8             | 4.5  | 12.6      | 1.5  |
| 2.0                    | 1.6  | 93.7             | 0.0 | 86.4      | 0.0 | 95.4           | 0.0 | 94.7      | 0.0 | 6.5                | 0.6  | 11.0      | 0.6  | 91.9             | 0.5  | 83.8      | 0.3  |
| 2.0                    | 3.1  | 86.9             | 0.1 | 88.6      | 0.0 | 89.8           | 0.1 | 99.4      | 0.0 | 10.1               | 0.8  | 9.0       | 0.8  | 88.8             | 0.8  | 81.0      | 0.4  |
| 2.0                    | 6.3  | 84.0             | 0.1 | 91.0      | 0.0 | 77.4           | 0.1 | 92.8      | 0.0 | 7.1                | 1.0  | 8.4       | 1.0  | 94.1             | 1.3  | 85.9      | 0.5  |
| 2.0                    | 12.5 | 75.4             | 0.2 | 88.4      | 0.0 | 74.2           | 0.2 | 85.1      | 0.0 | 9.5                | 1.5  | 5.8       | 1.5  | 64.6             | 2.3  | 59.0      | 0.8  |
| 2.0                    | 25   | 63.6             | 0.3 | 64.0      | 0.0 | 52.3           | 0.3 | 61.7      | 0.0 | 22.0               | 2.5  | 0         | 2.5  | 44.1             | 4.3  | 40.3      | 1.3  |
